# Supplementary material
Source: publisher site journal article supplement (https://www.dovepress.com/article/488154)
Supplement: Supplementary file 1 [file get_supplementary_file.php]

**Supporting information**

**Elucidating the mechanism of large-diameter titanium dioxide nanotubes in protecting osteoblasts under oxidative stress environment: The role of fibronectin and albumin adsorption**

Yun Xiang1,2,#, Dini Lin1,#, Qiang Zhou1, Hongyu Luo1, Zixin Zhou1, Shuyi Wu2, Keyuan Xu2, Xiaoting Tang1, Pingping Ma2, Chunyun Cai1,*, Xinkun Shen1,*

**Address:**

1Wenzhou Key Laboratory for the Diagnosis and Prevention of Diabetic Complications, The Third Affiliated Hospital of Wenzhou Medical University [(Ruian People's Hospital)](https://xueshu.baidu.com/s?wd=author%3A%28the%20Third%20Affiliated%20Hospital%20of%20Wenzhou%20Medical%20University%20%28Ruian%20People%27s%20Hospital%29%29%20Department%20of%20Gastroenterology&tn=SE_baiduxueshu_c1gjeupa&ie=utf-8&sc_f_para=sc_hilight%3Dperson), Wenzhou 325016, People’s Republic of China.

2School and Hospital of Stomatology, Wenzhou Medical University, Wenzhou 325027, People’s Republic of China.

**#Co-authors:**

These authors contributed equally to this work and share first authorship.

***Corresponding authors:**

Xinkun Shen:

Wenzhou Key Laboratory for the Diagnosis and Prevention of Diabetic Complications, The Third Affiliated Hospital of Wenzhou Medical University [(Ruian People's Hospital)](https://xueshu.baidu.com/s?wd=author%3A%28the%20Third%20Affiliated%20Hospital%20of%20Wenzhou%20Medical%20University%20%28Ruian%20People%27s%20Hospital%29%29%20Department%20of%20Gastroenterology&tn=SE_baiduxueshu_c1gjeupa&ie=utf-8&sc_f_para=sc_hilight%3Dperson), Wenzhou 325016, People’s Republic of China.

108# Wansong Road, Ruian City, Zhejiang Province, China; E-mail: shenxinkun123@wmu.edu.cn.

Chunyuan Cai:

Wenzhou Key Laboratory for the Diagnosis and Prevention of Diabetic Complications, The Third Affiliated Hospital of Wenzhou Medical University [(Ruian People's Hospital)](https://xueshu.baidu.com/s?wd=author%3A%28the%20Third%20Affiliated%20Hospital%20of%20Wenzhou%20Medical%20University%20%28Ruian%20People%27s%20Hospital%29%29%20Department%20of%20Gastroenterology&tn=SE_baiduxueshu_c1gjeupa&ie=utf-8&sc_f_para=sc_hilight%3Dperson), Wenzhou 325016, People’s Republic of China.

108# Wansong Road, Ruian City, Zhejiang Province, China; E-mail: caichunyuan123@wmu.edu.cn.


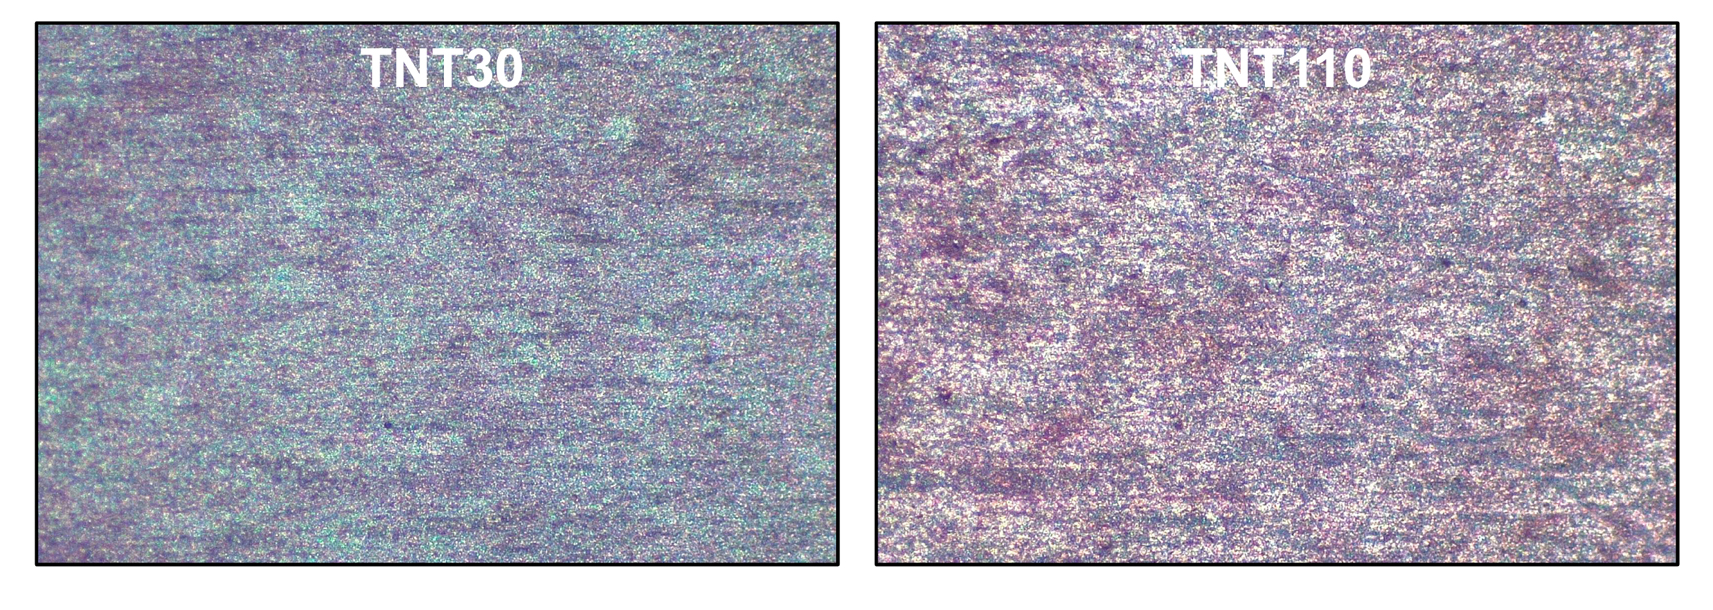


**Fig. S1**. Images of the mineralized nodules on TNT30 and TNT110 surfaces.


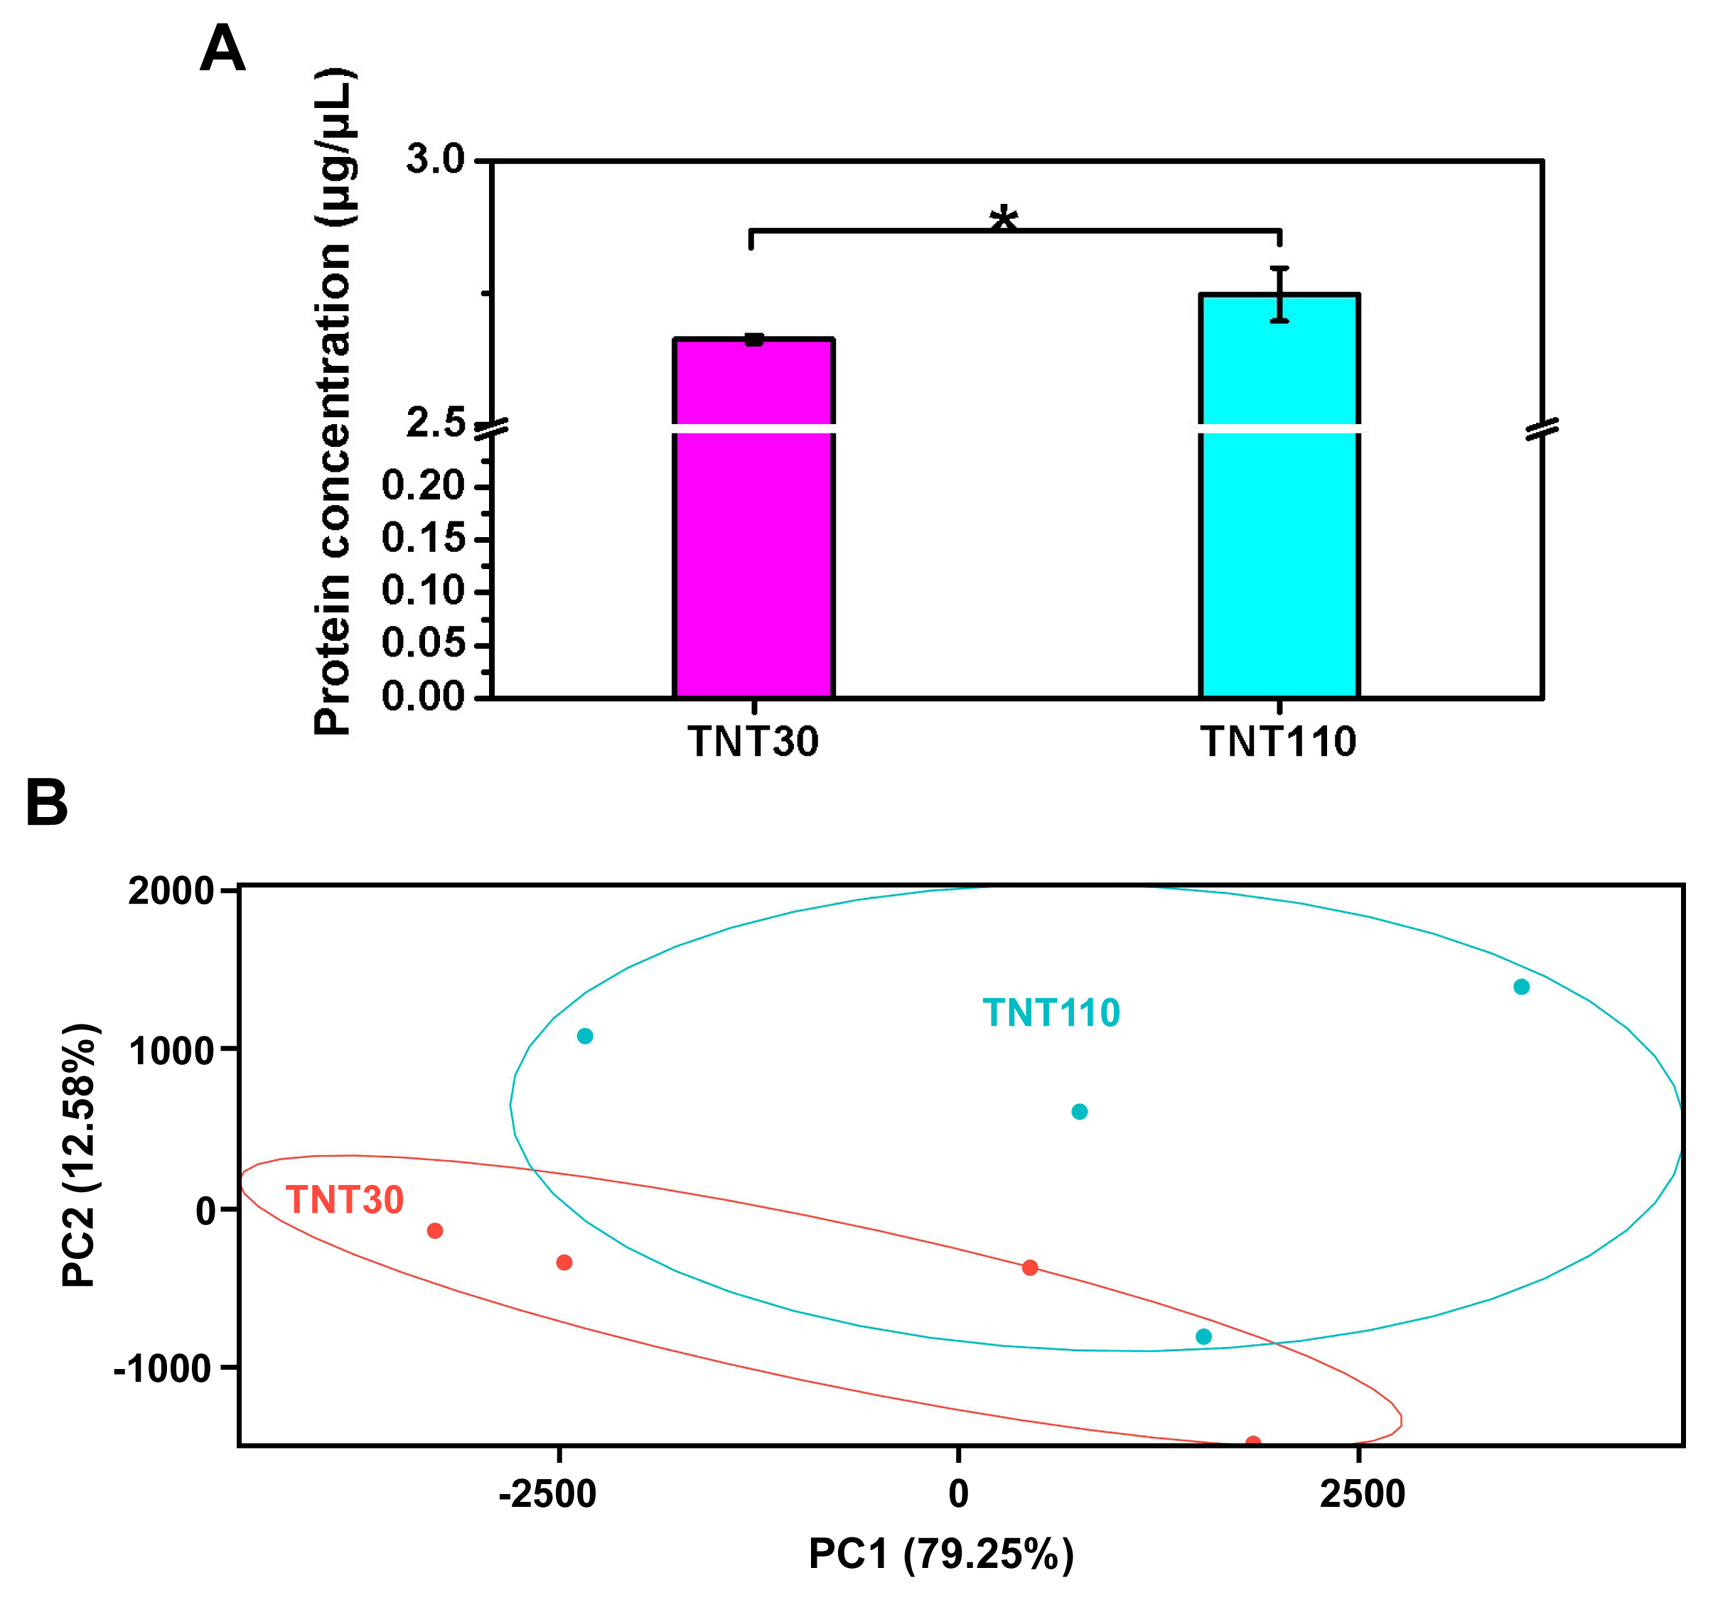


**Fig. S2**. Principal component analysis (PCA) for RNA sequencing.


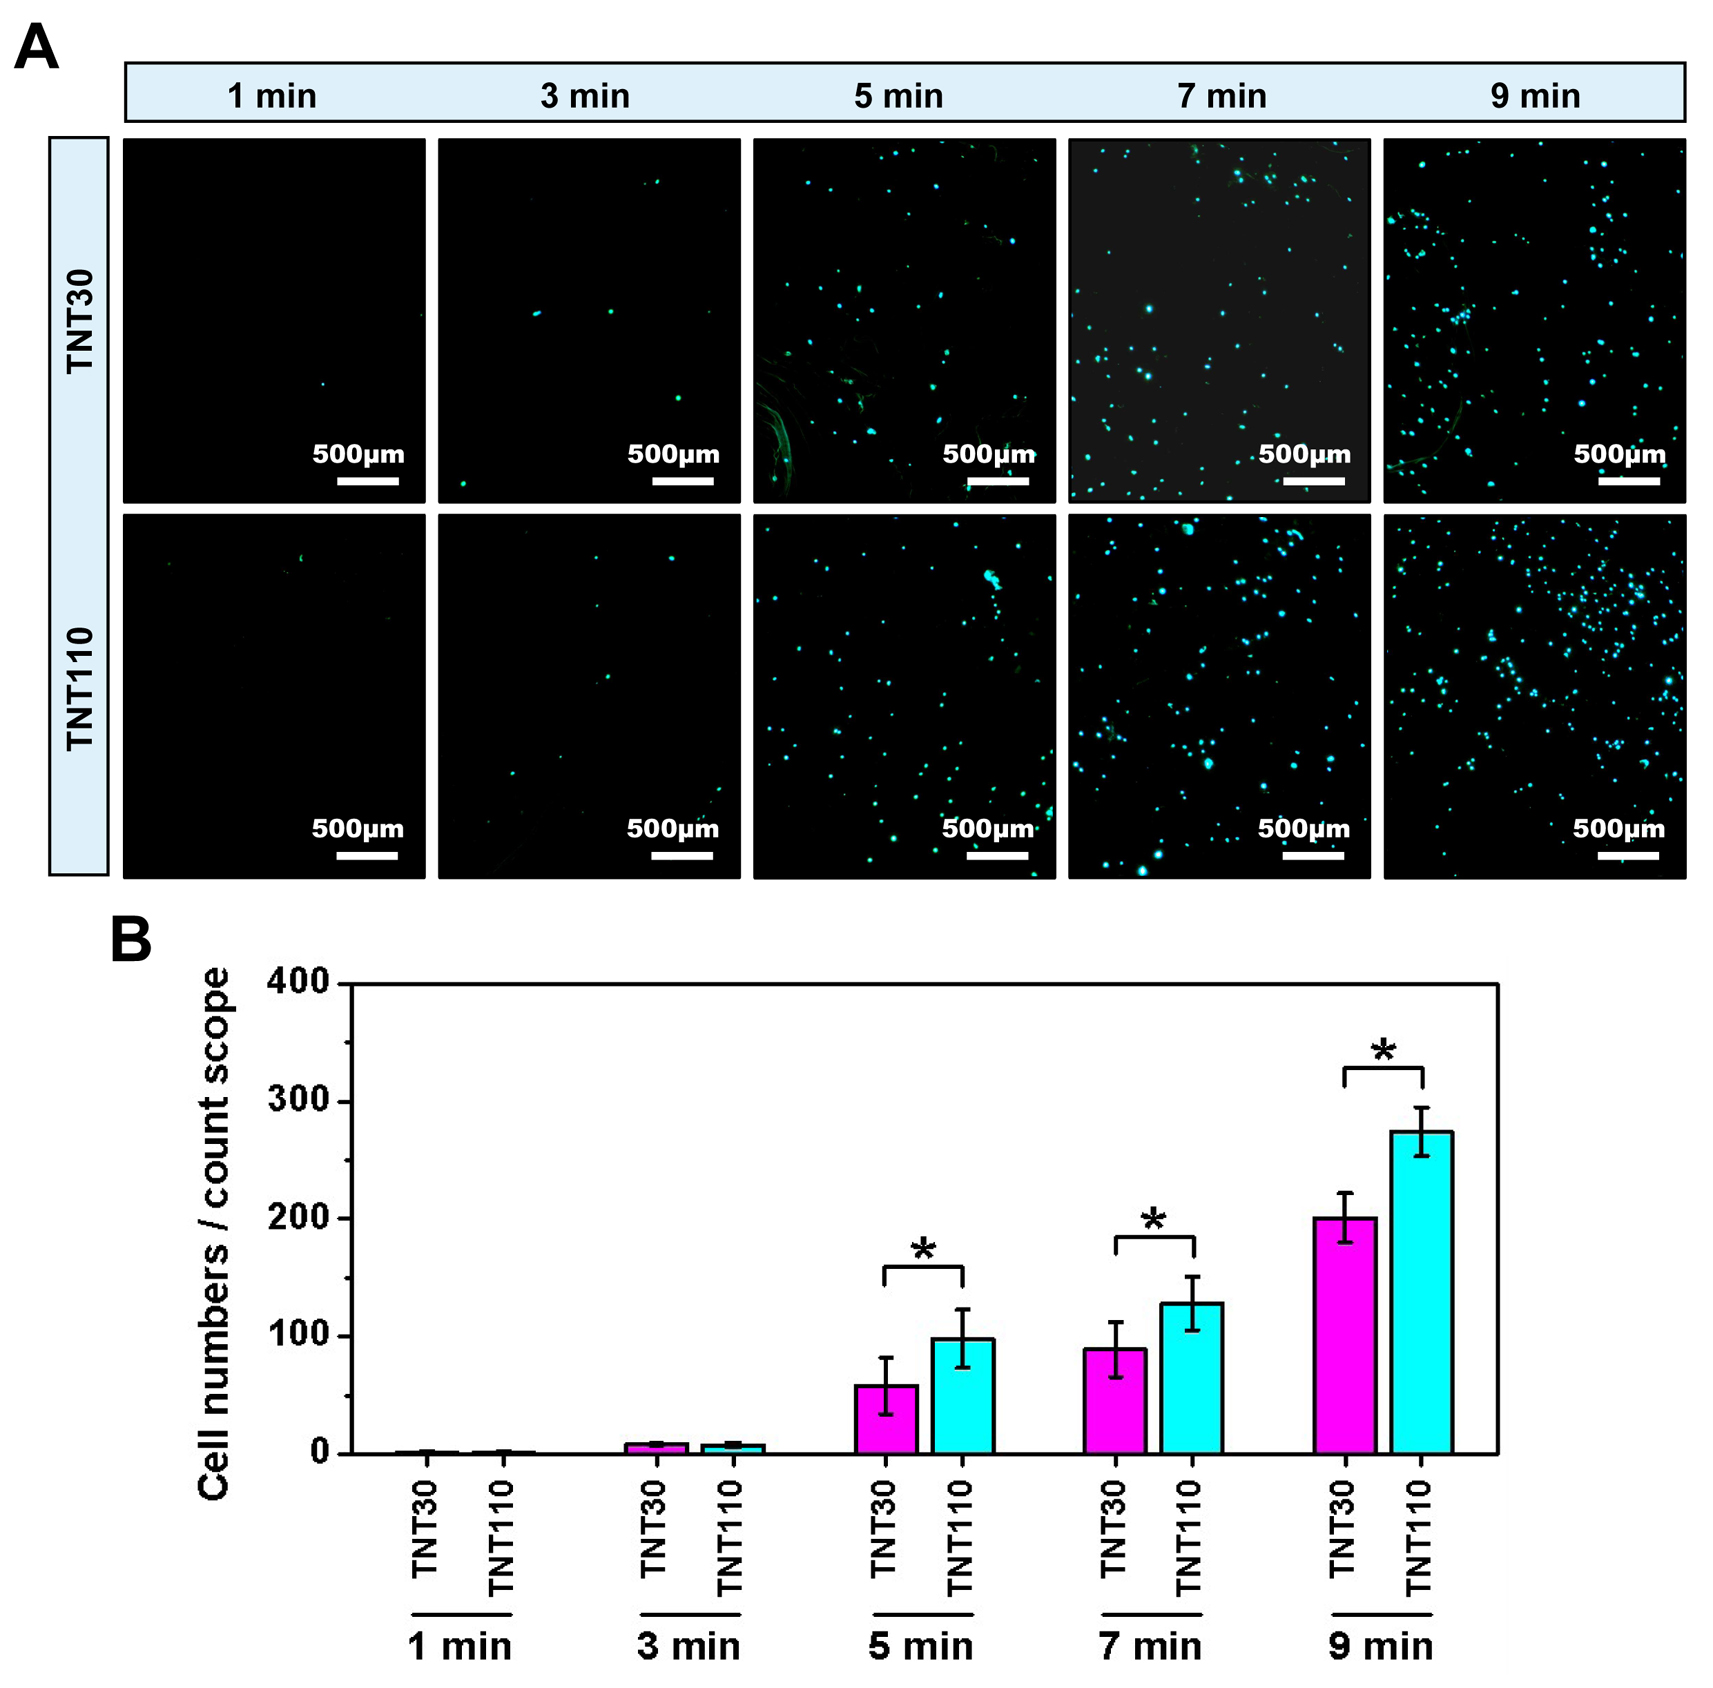


**Fig. S3**. (A) Nuclear staining images of MC3T3-E1 cells inoculated on TNT30 and TNT110 surfaces at 1, 3, 5, 7, and 9 min under OS conditions; and (B) Quantitative results of cell adhesion numbers,**P* < 0.05.


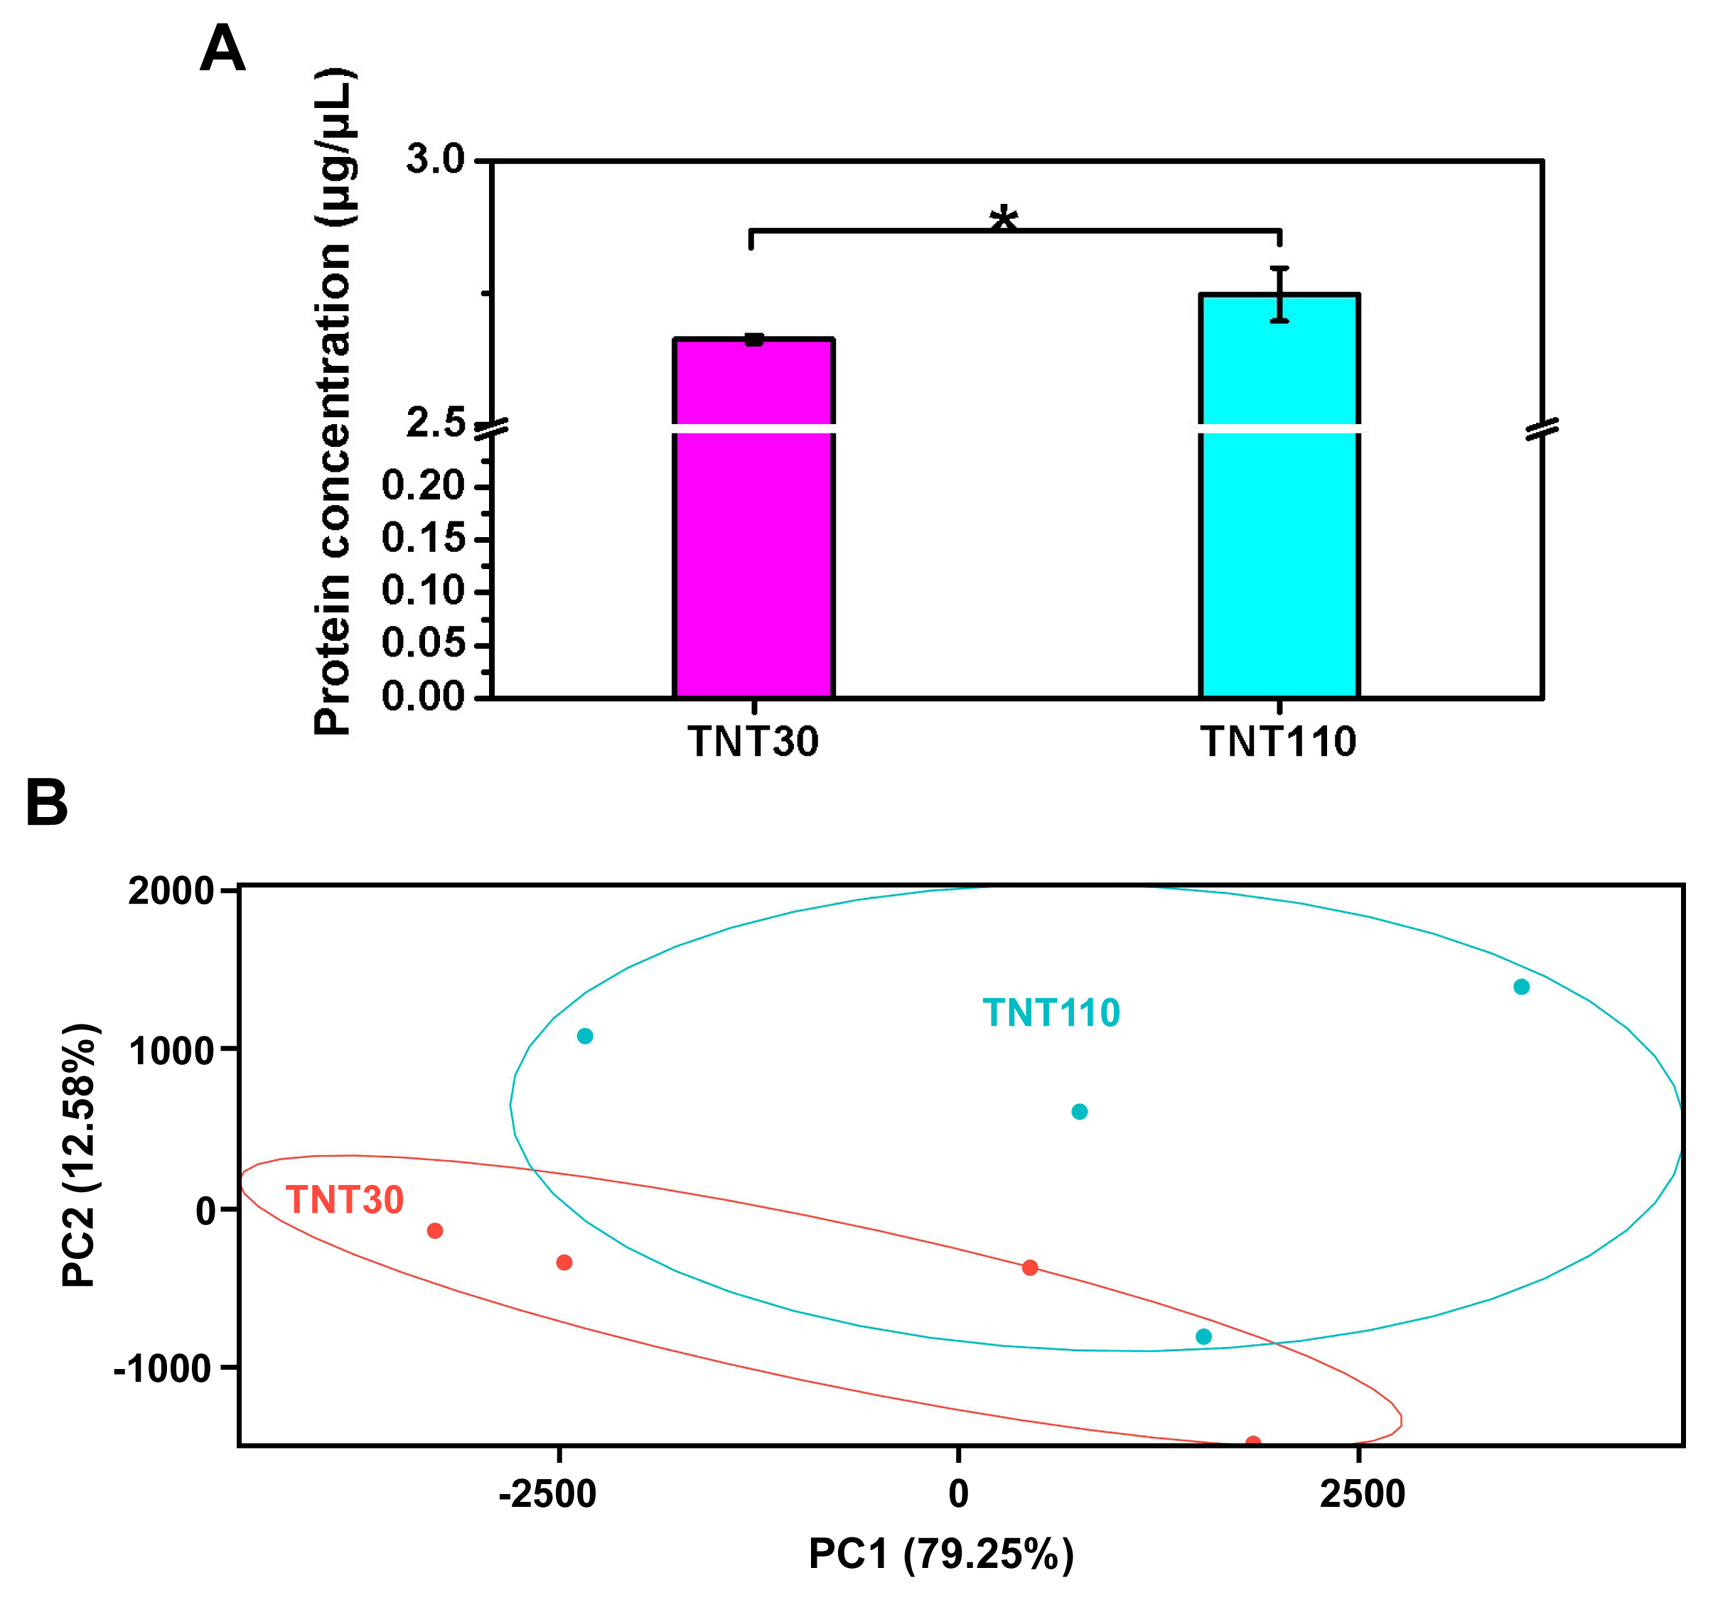


**Fig. S4**. Concentration of total proteins adsorbed on TNT30 and TNT110 surface after pre-adsorption of 10% FBS for 5 min, **P* < 0.05.


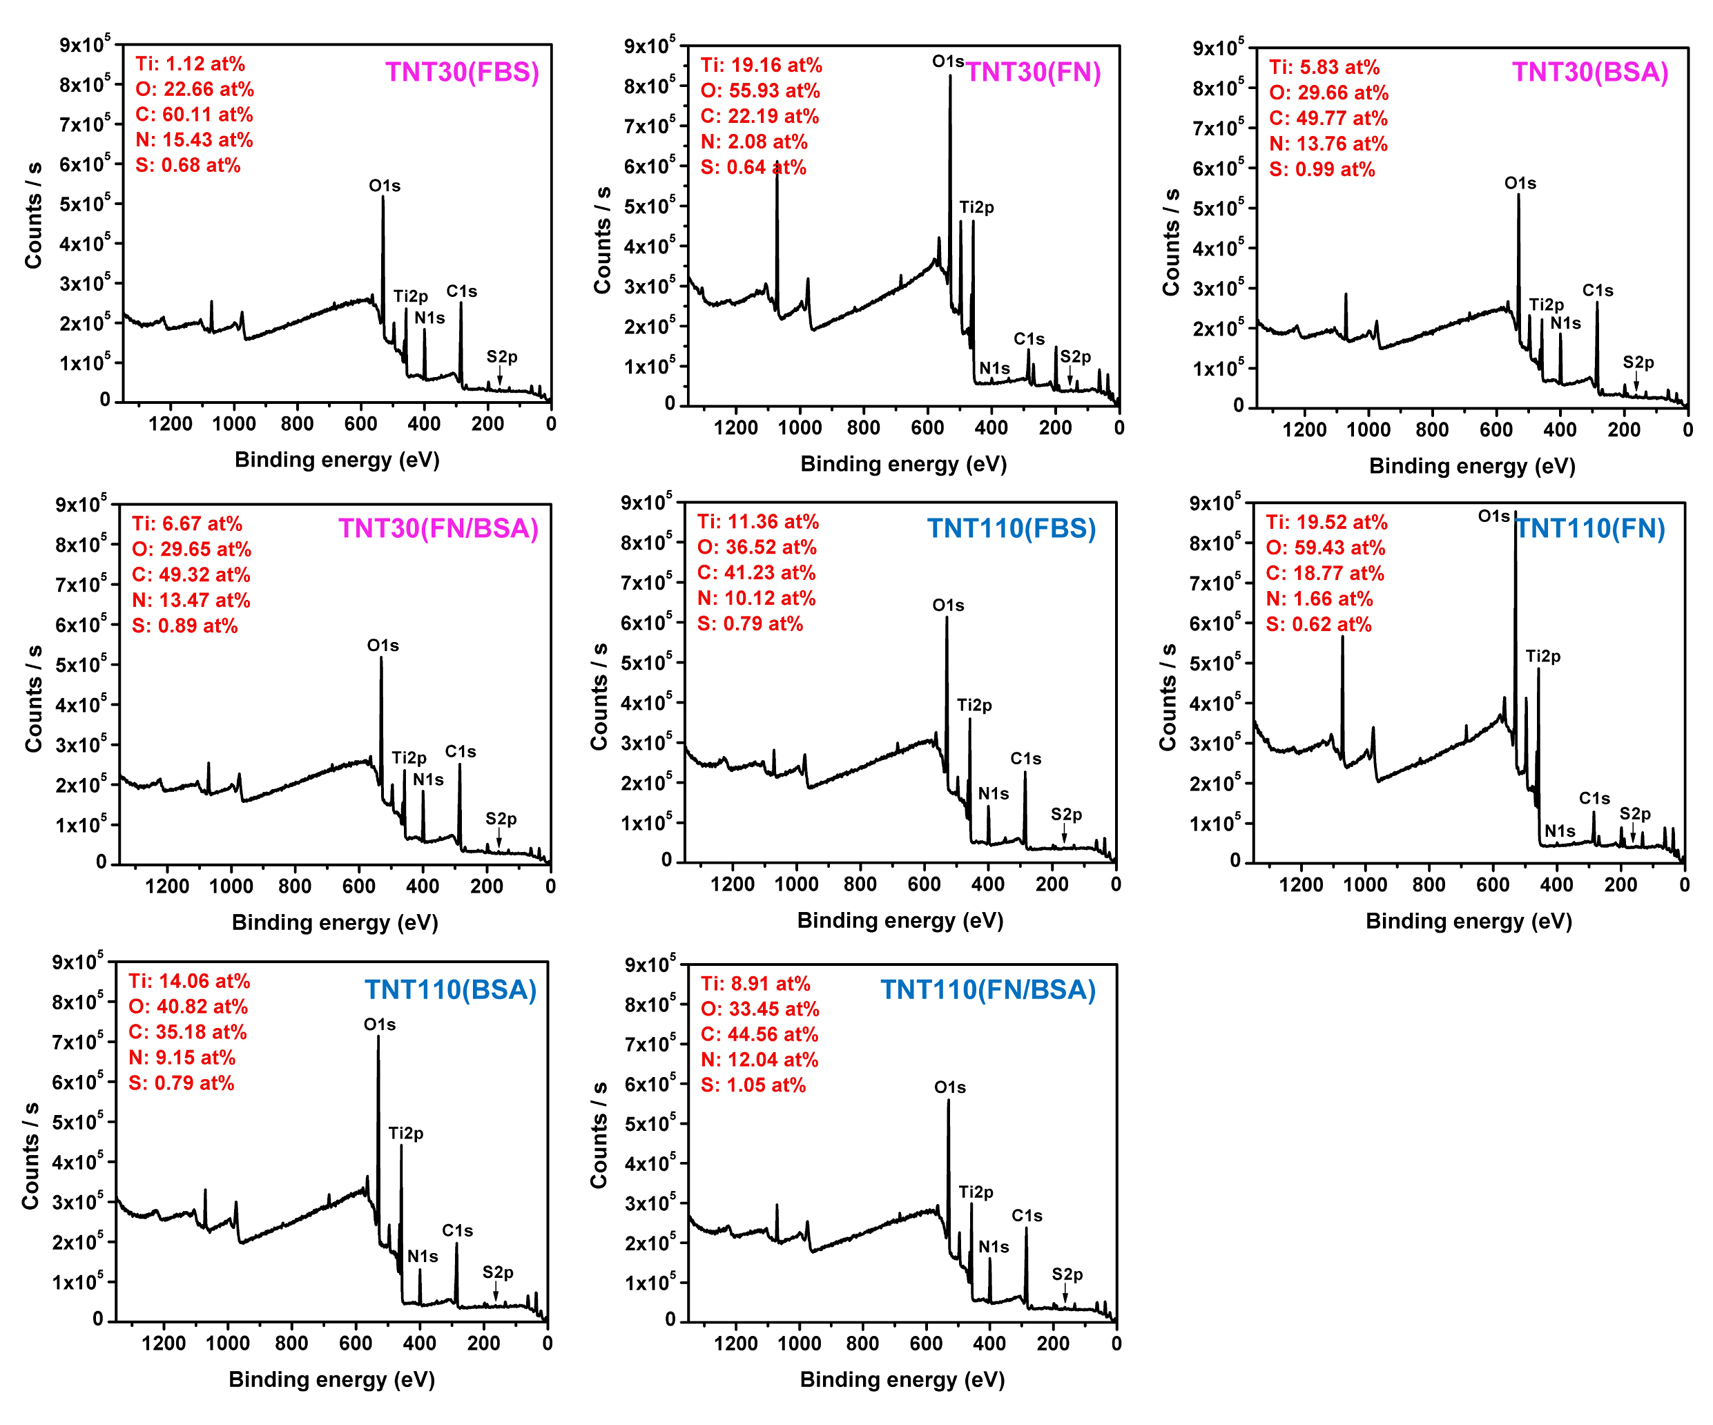


**Fig. S5**. XPS results of protein pre-adsorbed samples: TNT30(BSA), TNT30(FN), TNT30(FN/BSA), TNT30(FBS), TNT110(BSA), TNT110(FN) TNT110(FN/BSA), TNT110(FBS).
